# Supplementary material for: Pannexin-1 in Human Lymphatic Endothelial Cells Regulates Lymphangiogenesis
Source: PubMed Central journal article supplement (PMC6032340; doi:10.3390/ijms19061558), 2018-05-24
Supplement: ijms-19-01558-s001.pdf [file ijms-19-01558-s001.pdf]

Supplementary

# Pannexin-1 in Human Lymphatic Endothelial Cells Regulates Lymphangiogenesis

Jonathan Boucher, Claire Simonneau, Golthlay Denet, Jonathan Clarhaut, Annie-Claire Balandre, Marc Mesnil, Laurent Cronier and Arnaud Monvoisin

Table S1: qRT-PCR primers

| Gene ID | Forward                      | Reverse                     |
|---------|------------------------------|-----------------------------|
| PANX1   | 5'-CGTGACCTTGACATGAGAGATG-3' | 5'-CTGCTCCACAATTGGGTACTT-3' |
| PANX2   | 5'-TTCTGCGACATCAACATCCT-3'   | 5'-ACCACGTTGTCGTACATGAG-3'  |
| PANX3   | 5'-AAGGCTCGGAAAGAACGATAC-3'  | 5'-GGAGGTGAAGATGAGCAAGAG-3' |
| GAPDH   | 5'-TGCACCACCAACTGCTTAGC-3'   | 5'-GGCATGGACTGTGGTCATGAG-3' |

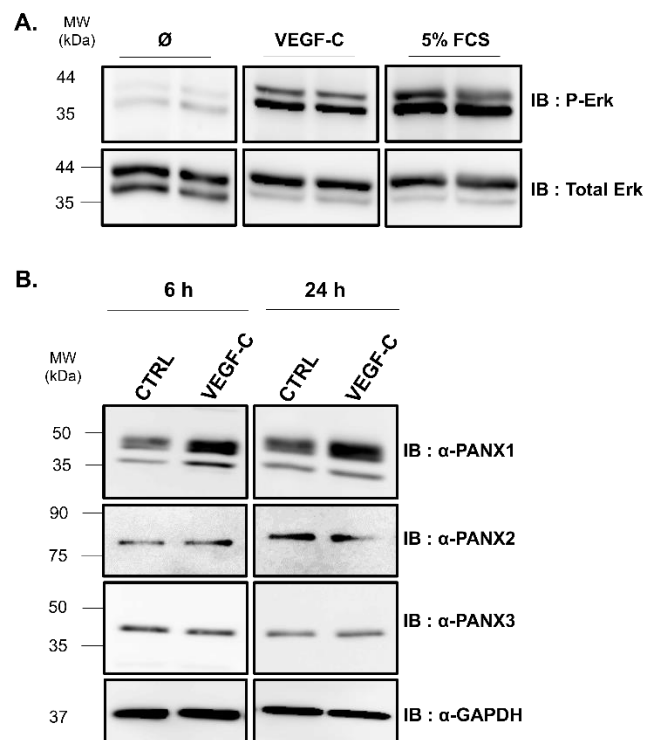

**Figure S1.** VEGF-C modulates PAN1 expression without interfering with PANX2 and PANX3 expressions. **(A)** We validated VEGF-C efficiency by showing increased ERK activation after stimulation of serum-starved HDLECs with VEGF-C (100 ng/mL). FCS was used as positive control. The blots are representative of two independent experiments. **(B)** PANX1 expression was increased after 6 and 24 h of incubation with VEGF-C (100 ng/mL). VEGF-C did not seem to regulate PANX2 and PANX3 expressions. The blots are representative of two or three independent experiments ( $N = 3$  for PANX1,  $N = 2$  for PANX2 and PANX3).

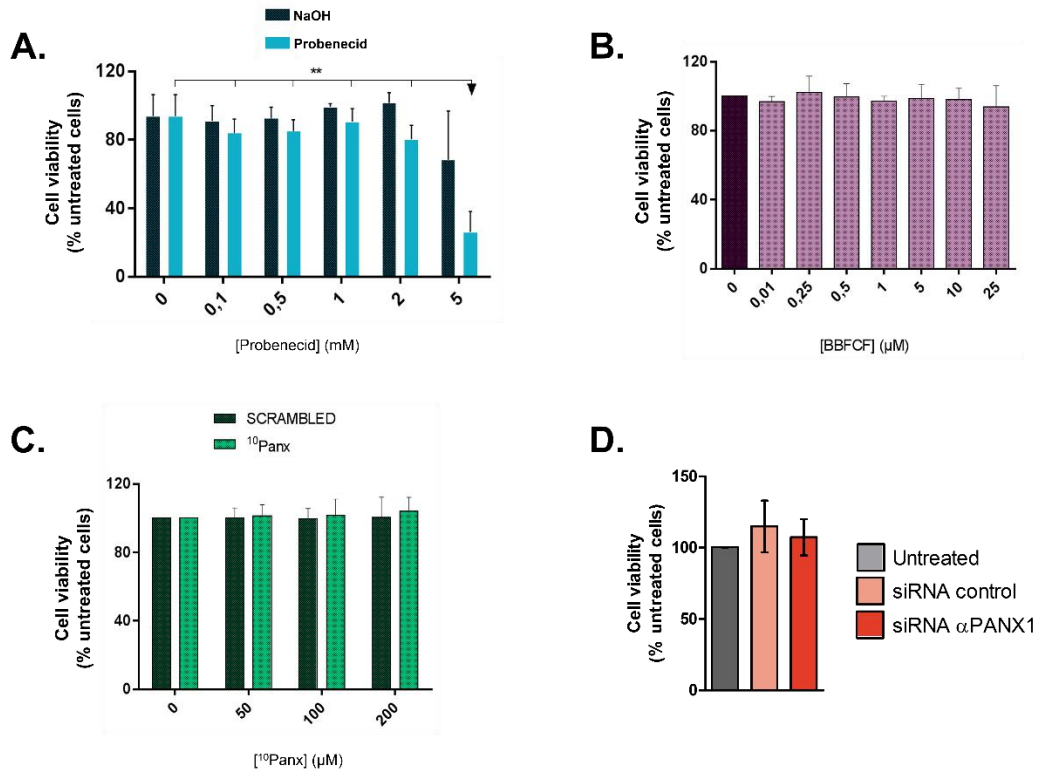

**Figure S2.** HDLECs viability assay at different concentrations of Probenecid, BBFCF and <sup>10</sup>Panx. HDLECs viability was assessed in 96-well plates with the Cell Proliferation Kit II (XTT, Sigma-Aldrich) after 24 h incubation with increasing concentrations of the different inhibitors or after siRNA treatments. (A) Probenecid had no cytotoxic effects up to the dose of 2 mM. (B) BBFCF and (C) <sup>10</sup>Panx had no cytotoxic effects even at the maximum tested concentrations of 25 μM and 200 mM respectively. (D) siRNA control and anti-PANX1 transfections had no cytotoxic effects compared to untreated cells. Data obtained from four independent experiments performed in quadruplicate. \*\*  $p < 0.01$ .

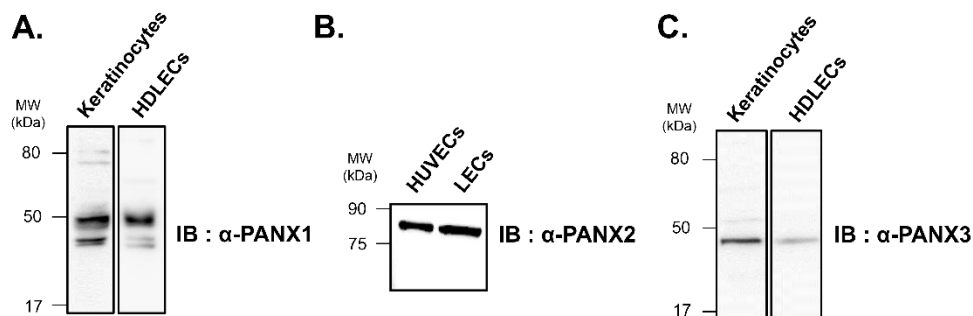

**Figure S3.** Determination of the sensitivity of antibodies to PANXs. Lysates from human primary keratinocytes and Human Umbilical Vein Endothelial Cells (HUVECs) were used as a positive control to assess the sensitivity of PANXs antibodies directed against (A) PANX1, (B) PANX2 or (C) PANX3.
